# Supplementary material for: Antimicrobial Ionic Liquids: Ante-Mortem Mechanisms of Pathogenic EPEC and MRSA Examined by FTIR Spectroscopy
Source: MDPI journal article supplement (doi:10.3390/ijms25094705), 2024-04-26
Supplement: s1 [file s1]

**Table S1:** Dose-Dependent Mortality Rates of MRSA exposed to [C<sub>n</sub>mim][Cl] based ILs and corresponding molecular response values for four selected spectral regions.

| IL name                   | IL concentration [mM] | Mortality [%] |       | d-values for 2860-2845 cm <sup>-1</sup> |       | d-values for 2935-2915 cm <sup>-1</sup> |       | d-values for 1570-1515 cm <sup>-1</sup> |       | d-values for 1690-1620 cm <sup>-1</sup> |       |
|---------------------------|-----------------------|---------------|-------|-----------------------------------------|-------|-----------------------------------------|-------|-----------------------------------------|-------|-----------------------------------------|-------|
|                           |                       | Mean          | SD    | Mean                                    | SD    | Mean                                    | SD    | Mean                                    | SD    | Mean                                    | SD    |
| [C <sub>2</sub> mim][Cl]  | 0                     | 0.0%          | 0.0%  | 0.000                                   | 0.000 | 0.000                                   | 0.000 | 0.000                                   | 0.000 | 0.000                                   | 0.000 |
|                           | 750                   | 56.3%         | 25.5% | 0.195                                   | 0.139 | 0.534                                   | 0.371 | 0.268                                   | 0.026 | 0.330                                   | 0.155 |
|                           | 1000                  | 58.6%         | 17.2% | 0.084                                   | 0.067 | 0.213                                   | 0.173 | 0.364                                   | 0.256 | 0.317                                   | 0.240 |
| [C <sub>4</sub> mim][Cl]  | 0                     | 0.0%          | 0.0%  | 0.000                                   | 0.000 | 0.000                                   | 0.034 | 0.000                                   | 0.000 | 0.000                                   | 0.000 |
|                           | 125                   | 9.5%          | 0.0%  | 0.004                                   | 0.003 | 0.047                                   | 0.122 | 0.062                                   | 0.050 | 0.034                                   | 0.019 |
|                           | 250                   | 28.5%         | 0.0%  | 0.008                                   | 0.009 | 0.150                                   | 0.000 | 0.120                                   | 0.099 | 0.055                                   | 0.034 |
|                           | 500                   | 20.6%         | 12.4% | 0.052                                   | 0.016 | 0.742                                   | 0.240 | 0.302                                   | 0.059 | 0.308                                   | 0.206 |
|                           | 750                   | 36.3%         | 45.2% | 0.321                                   | 0.322 | 1.081                                   | 0.935 | 0.386                                   | 0.230 | 2.112                                   | 2.123 |
|                           | 1000                  | 66.7%         | 33.3% | 0.392                                   | 0.316 | 1.257                                   | 0.835 | 0.424                                   | 0.263 | 2.928                                   | 2.420 |
| [C <sub>6</sub> mim][Cl]  | 0                     | 0.0%          | 0.0%  | 0.000                                   | 0.000 | 0.000                                   | 0.000 | 0.000                                   | 0.000 | 0.000                                   | 0.000 |
|                           | 50                    | 98.4%         | 1.9%  | 0.524                                   | 0.190 | 1.458                                   | 0.825 | 0.285                                   | 0.092 | 2.267                                   | 0.247 |
|                           | 125                   | 100.0%        | 0.1%  | 0.475                                   | 0.330 | 1.301                                   | 1.063 | 0.559                                   | 0.231 | 3.539                                   | 0.886 |
| [C <sub>8</sub> mim][Cl]  | 250                   | 100.0%        | 0.0%  | 0.362                                   | 0.368 | 0.980                                   | 1.097 | 0.717                                   | 0.108 | 4.773                                   | 1.222 |
|                           | 0                     | 0.0%          | 0.0%  | 0.000                                   | 0.000 | 0.000                                   | 0.000 | 0.000                                   | 0.000 | 0.000                                   | 0.000 |
|                           | 1                     | 27.5%         | 26.3% | 0.484                                   | 0.271 | 1.529                                   | 0.983 | 0.241                                   | 0.028 | 0.371                                   | 0.122 |
|                           | 5                     | 99.9%         | 0.1%  | 0.341                                   | 0.238 | 0.996                                   | 0.743 | 0.300                                   | 0.057 | 2.238                                   | 0.293 |
| [C <sub>10</sub> mim][Cl] | 12.5                  | 100.0%        | 0.1%  | 0.427                                   | 0.181 | 1.364                                   | 0.746 | 0.718                                   | 0.244 | 3.110                                   | 1.059 |
|                           | 0                     | 0.0%          | 0.0%  | 0.000                                   | 0.000 | 0.000                                   | 0.000 | 0.000                                   | 0.000 | 0.000                                   | 0.000 |
|                           | 0.1                   | 17.5%         | 6.3%  | 0.332                                   | 0.330 | 1.107                                   | 1.187 | 0.272                                   | 0.076 | 0.214                                   | 0.063 |
|                           | 0.5                   | 99.9%         | 0.1%  | 0.302                                   | 0.197 | 0.822                                   | 0.615 | 0.209                                   | 0.045 | 1.165                                   | 0.381 |
|                           | 1                     | 99.7%         | 0.4%  | 0.261                                   | 0.152 | 0.671                                   | 0.409 | 0.262                                   | 0.074 | 1.960                                   | 0.357 |
| [C <sub>10</sub> mim][Cl] | 5                     | 100.0%        | 0.0%  | 0.402                                   | 0.239 | 0.958                                   | 0.505 | 0.627                                   | 0.234 | 3.214                                   | 0.798 |

**Table S2:** Dose-Dependent Mortality Rates of MRSA exposed to [C<sub>n</sub>mim][X] based ILs and corresponding molecular response values for four selected spectral regions.

| IL name                                | IL concentration [mM] | Mortality [%] |       | d-values for 2860-2845 cm <sup>-1</sup> |       | d-values for 2935-2915 cm <sup>-1</sup> |       | d-values for 1570-1515 cm <sup>-1</sup> |       | d-values for 1690-1620 cm <sup>-1</sup> |       |
|----------------------------------------|-----------------------|---------------|-------|-----------------------------------------|-------|-----------------------------------------|-------|-----------------------------------------|-------|-----------------------------------------|-------|
|                                        |                       | Mean          | SD    | Mean                                    | SD    | Mean                                    | SD    | Mean                                    | SD    | Mean                                    | SD    |
| [C <sub>4</sub> mim][BF <sub>4</sub> ] | 0                     | 0.0%          | 0.0%  | 0.000                                   | 0.000 | 0.000                                   | 0.000 | 0.000                                   | 0.000 | 0.000                                   | 0.000 |
|                                        | 10                    | 0.0%          | 0.0%  | 0.923                                   | 0.587 | 2.422                                   | 1.809 | 0.210                                   | 0.059 | 0.629                                   | 0.323 |
|                                        | 50                    | 72.2%         | 41.7% | 0.972                                   | 0.523 | 2.424                                   | 1.670 | 0.337                                   | 0.128 | 1.558                                   | 0.377 |
|                                        | 125                   | 100.0%        | 0.0%  | 0.781                                   | 0.396 | 1.764                                   | 1.085 | 0.456                                   | 0.093 | 2.536                                   | 0.500 |
| [C <sub>4</sub> mim][HFB]              | 0                     | 0.0%          | 0.0%  | 0.000                                   | 0.000 | 0.000                                   | 0.000 | 0.000                                   | 0.000 | 0.000                                   | 0.000 |
|                                        | 50                    | 10.4%         | 14.7% | 0.282                                   | 0.176 | 0.390                                   | 0.115 | 0.381                                   | 0.111 | 0.373                                   | 0.015 |
|                                        | 125                   | 13.0%         | 18.3% | 0.399                                   | 0.310 | 0.829                                   | 0.309 | 0.380                                   | 0.097 | 0.722                                   | 0.144 |
|                                        | 250                   | 100.0%        | 0.0%  | 0.365                                   | 0.368 | 0.650                                   | 0.644 | 0.468                                   | 0.365 | 4.110                                   | 0.847 |
|                                        | 500                   | 100.0%        | 0.0%  | 0.233                                   | 0.116 | 0.562                                   | 0.244 | 1.036                                   | 0.099 | 6.461                                   | 0.403 |
| [C <sub>4</sub> mim][PF <sub>6</sub> ] | 0                     | 0.0%          | 0.0%  | 0.000                                   | 0.000 | 0.000                                   | 0.000 | 0.000                                   | 0.000 | 0.000                                   | 0.000 |
|                                        | 50                    | 15.4%         | 0.0%  | 0.738                                   | 0.688 | 2.042                                   | 1.679 | 0.529                                   | 0.427 | 0.380                                   | 0.279 |
|                                        | 125                   | 44.9%         | 21.8% | 0.551                                   | 0.442 | 1.689                                   | 1.520 | 0.322                                   | 0.044 | 0.547                                   | 0.070 |
|                                        | 250                   | 84.1%         | 16.1% | 0.364                                   | 0.342 | 0.972                                   | 1.075 | 0.350                                   | 0.171 | 0.808                                   | 0.291 |
|                                        | 500                   | 96.1%         | 6.6%  | 0.474                                   | 0.356 | 1.431                                   | 1.257 | 0.388                                   | 0.239 | 1.532                                   | 0.641 |
|                                        | 750                   | 100.0%        | 0.0%  | 0.236                                   | 0.287 | 0.740                                   | 1.085 | 0.388                                   | 0.230 | 2.979                                   | 0.602 |
|                                        | 1000                  | 100.0%        | 0.0%  | 0.028                                   | 0.023 | 0.177                                   | 0.004 | 0.322                                   | 0.007 | 4.053                                   | 0.065 |
| [C <sub>4</sub> mim][TFA]              | 0                     | 0.0%          | 0.0%  | 0.000                                   | 0.000 | 0.000                                   | 0.000 | 0.000                                   | 0.000 | 0.000                                   | 0.000 |
|                                        | 125                   | 20.0%         | 0.0%  | 0.261                                   | 0.253 | 0.379                                   | 0.348 | 0.240                                   | 0.219 | 0.136                                   | 0.093 |
|                                        | 250                   | 33.5%         | 27.5% | 0.536                                   | 0.560 | 1.107                                   | 0.998 | 0.188                                   | 0.019 | 1.035                                   | 0.330 |
|                                        | 500                   | 86.1%         | 19.1% | 0.542                                   | 0.610 | 2.003                                   | 2.198 | 0.788                                   | 0.049 | 2.848                                   | 1.160 |
|                                        | 750                   | 76.2%         | 33.6% | 0.456                                   | 0.539 | 1.094                                   | 1.171 | 0.357                                   | 0.167 | 2.336                                   | 1.505 |
|                                        | 1000                  | 100.0%        | 0.0%  | 0.429                                   | 0.532 | 0.920                                   | 1.067 | 0.583                                   | 0.028 | 3.950                                   | 0.615 |
| [C <sub>2</sub> mim][Triflat]          | 0                     | 0.0%          | 0.0%  | 0.000                                   | 0.000 | 0.000                                   | 0.000 | 0.000                                   | 0.000 | 0.000                                   | 0.000 |
|                                        | 50                    | 0.0%          | 0.0%  | 0.611                                   | 0.525 | 2.714                                   | 2.327 | 0.176                                   | 0.132 | 0.122                                   | 0.083 |
|                                        | 125                   | 33.3%         | 0.0%  | 0.588                                   | 0.506 | 2.701                                   | 2.316 | 0.367                                   | 0.202 | 0.234                                   | 0.117 |
|                                        | 250                   | 0.0%          | 0.0%  | 0.676                                   | 0.579 | 3.551                                   | 3.015 | 0.669                                   | 0.390 | 0.297                                   | 0.172 |
|                                        | 500                   | 26.7%         | 26.7% | 0.462                                   | 0.240 | 1.875                                   | 1.325 | 0.176                                   | 0.024 | 0.603                                   | 0.186 |
|                                        | 750                   | 100.0%        | 0.0%  | 0.173                                   | 0.009 | 0.685                                   | 0.556 | 1.372                                   | 0.173 | 7.585                                   | 0.387 |
|                                        | 1000                  | 100.0%        | 0.0%  | 0.198                                   | 0.070 | 0.881                                   | 0.742 | 1.213                                   | 0.367 | 6.328                                   | 1.867 |

**Table S3:** Dose-Dependent Mortality Rates of MRSA exposed to Ammonium based ILs and corresponding molecular response values for four selected spectral regions.

| IL name                   | IL concentration [mM] | Mortality [%] |       | d-values for 2860-2845 cm <sup>-1</sup> |       | d-values for 2935-2915 cm <sup>-1</sup> |       | d-values for 1570-1515 cm <sup>-1</sup> |       | d-values for 1690-1620 cm <sup>-1</sup> |       |
|---------------------------|-----------------------|---------------|-------|-----------------------------------------|-------|-----------------------------------------|-------|-----------------------------------------|-------|-----------------------------------------|-------|
|                           |                       | Mean          | SD    | Mean                                    | SD    | Mean                                    | SD    | Mean                                    | SD    | Mean                                    | SD    |
| [TMA][Cl]                 | 0                     | 0.0%          | 0.0%  | 0.000                                   | 0.000 | 0.000                                   | 0.000 | 0.000                                   | 0.000 | 0.000                                   | 0.000 |
|                           | 250                   | 4.3%          | 25.9% | 0.444                                   | 0.333 | 1.404                                   | 1.036 | 0.186                                   | 0.128 | 0.106                                   | 0.082 |
|                           | 500                   | 15.9%         | 15.8% | 0.563                                   | 0.396 | 1.860                                   | 1.169 | 0.183                                   | 0.125 | 0.117                                   | 0.089 |
|                           | 750                   | 12.5%         | 12.5% | 0.973                                   | 0.032 | 3.168                                   | 0.003 | 0.277                                   | 0.006 | 0.166                                   | 0.053 |
|                           | 1000                  | 8.8%          | 12.4% | 0.685                                   | 0.492 | 2.245                                   | 1.634 | 0.220                                   | 0.153 | 0.155                                   | 0.065 |
| [TMC <sub>4</sub> A][Cl]  | 0                     | 0.0%          | 0.0%  | 0.000                                   | 0.000 | 0.000                                   | 0.000 | 0.000                                   | 0.000 | 0.000                                   | 0.000 |
|                           | 50                    | 0.0%          | 0.0%  | 0.560                                   | 0.577 | 1.826                                   | 1.705 | 0.329                                   | 0.246 | 0.073                                   | 0.036 |
|                           | 125                   | 0.0%          | 0.0%  | 0.611                                   | 0.629 | 2.107                                   | 2.022 | 0.322                                   | 0.241 | 0.081                                   | 0.050 |
|                           | 250                   | -12.5%        | 12.5% | 0.855                                   | 0.008 | 2.759                                   | 0.173 | 0.274                                   | 0.201 | 0.143                                   | 0.053 |
|                           | 500                   | 12.5%         | 12.5% | 1.397                                   | 0.180 | 4.427                                   | 0.473 | 0.256                                   | 0.018 | 0.156                                   | 0.048 |
|                           | 750                   | -25.0%        | 25.0% | 1.513                                   | 0.008 | 4.696                                   | 0.149 | 0.247                                   | 0.015 | 0.226                                   | 0.036 |
|                           | 1000                  | 62.5%         | 0.0%  | 1.382                                   | 1.178 | 4.348                                   | 3.669 | 0.252                                   | 0.164 | 0.393                                   | 0.311 |
| [TMC <sub>8</sub> A][Cl]  | 0                     | 0.0%          | 0.0%  | 0.000                                   | 0.000 | 0.000                                   | 0.000 | 0.000                                   | 0.000 | 0.000                                   | 0.000 |
|                           | 12.5                  | 91.2%         | 7.6%  | 0.464                                   | 0.463 | 1.340                                   | 1.326 | 0.176                                   | 0.010 | 0.929                                   | 0.622 |
|                           | 25                    | 99.9%         | 0.1%  | 0.338                                   | 0.337 | 1.083                                   | 1.061 | 0.350                                   | 0.028 | 1.737                                   | 0.679 |
|                           | 50                    | 100.0%        | 0.0%  | 0.299                                   | 0.272 | 0.910                                   | 0.761 | 0.495                                   | 0.074 | 2.549                                   | 0.863 |
| [TMC <sub>10</sub> A][Cl] | 0                     | 0.0%          | 0.0%  | 0.000                                   | 0.000 | 0.000                                   | 0.000 | 0.000                                   | 0.000 | 0.000                                   | 0.000 |
|                           | 0.1                   | 0.0%          | 0.0%  | 0.685                                   | 0.217 | 2.019                                   | 0.887 | 0.241                                   | 0.011 | 0.148                                   | 0.004 |
|                           | 0.5                   | 100.0%        | 0.0%  | 0.216                                   | 0.105 | 0.587                                   | 0.254 | 0.257                                   | 0.004 | 0.926                                   | 0.009 |
|                           | 1                     | 99.6%         | 0.6%  | 0.268                                   | 0.206 | 0.683                                   | 0.567 | 0.301                                   | 0.074 | 1.601                                   | 0.413 |
|                           | 5                     | 100.0%        | 0.0%  | 0.368                                   | 0.246 | 0.395                                   | 0.191 | 0.523                                   | 0.103 | 2.569                                   | 1.002 |
| [TMC <sub>12</sub> A][Cl] | 0                     | 0.0%          | 0.0%  | 0.000                                   | 0.000 | 0.000                                   | 0.000 | 0.000                                   | 0.000 | 0.000                                   | 0.000 |
|                           | 0.1                   | 0.0%          | 0.0%  | 0.065                                   | 0.063 | 0.157                                   | 0.137 | 0.258                                   | 0.197 | 0.236                                   | 0.161 |
|                           | 0.5                   | 0.0%          | 0.0%  | 0.769                                   | 0.201 | 1.943                                   | 1.090 | 0.220                                   | 0.011 | 0.338                                   | 0.082 |
|                           | 1                     | 39.3%         | 85.6% | 0.588                                   | 0.190 | 1.370                                   | 0.545 | 0.197                                   | 0.043 | 1.073                                   | 0.330 |
|                           | 5                     | 100.0%        | 0.0%  | 0.273                                   | 0.129 | 0.554                                   | 0.337 | 0.320                                   | 0.076 | 2.685                                   | 0.500 |
|                           | 10                    | 100.0%        | 0.0%  | 0.196                                   | 0.164 | 0.417                                   | 0.374 | 0.571                                   | 0.091 | 3.095                                   | 0.540 |
| [TMC <sub>16</sub> A][Cl] | 0                     | 0.0%          | 0.0%  | 0.000                                   | 0.000 | 0.000                                   | 0.000 | 0.000                                   | 0.000 | 0.000                                   | 0.000 |
|                           | 0.05                  | 25.0%         | 43.3% | 1.667                                   | 0.522 | 5.225                                   | 1.763 | 0.262                                   | 0.035 | 0.124                                   | 0.049 |
|                           | 0.1                   | 25.0%         | 43.3% | 1.662                                   | 0.638 | 5.184                                   | 2.125 | 0.218                                   | 0.048 | 0.193                                   | 0.056 |
|                           | 0.5                   | 73.6%         | 52.9% | 0.582                                   | 0.367 | 2.181                                   | 1.138 | 0.238                                   | 0.081 | 0.570                                   | 0.223 |
|                           | 1                     | 91.7%         | 16.5% | 0.409                                   | 0.366 | 1.582                                   | 1.123 | 0.281                                   | 0.073 | 0.682                                   | 0.084 |
|                           | 5                     | 100.0%        | 0.0%  | 0.298                                   | 0.232 | 0.936                                   | 0.424 | 0.355                                   | 0.134 | 0.918                                   | 0.106 |
| [TC <sub>8</sub> MA][Cl]  | 0                     | 0.0%          | 0.0%  | 0.000                                   | 0.000 | 0.000                                   | 0.000 | 0.000                                   | 0.000 | 0.000                                   | 0.000 |
|                           | 0.01                  | 61.5%         | 0.0%  | 0.819                                   | 0.736 | 2.710                                   | 2.398 | 0.234                                   | 0.184 | 0.090                                   | 0.070 |
|                           | 0.05                  | 80.7%         | 19.6% | 0.128                                   | 0.067 | 0.478                                   | 0.134 | 0.180                                   | 0.016 | 0.432                                   | 0.261 |
|                           | 0.1                   | 100.0%        | 0.0%  | 0.456                                   | 0.246 | 0.982                                   | 0.620 | 0.171                                   | 0.003 | 1.269                                   | 0.373 |
|                           | 0.25                  | 100.0%        | 0.0%  | 3.305                                   | 2.558 | 5.460                                   | 4.190 | 0.265                                   | 0.178 | 2.471                                   | 1.898 |
| [DC <sub>8</sub> DMA][Cl] | 0                     | 0.0%          | 0.0%  | 0.000                                   | 0.000 | 0.000                                   | 0.000 | 0.000                                   | 0.000 | 0.000                                   | 0.000 |
|                           | 0.05                  | 0.0%          | 0.0%  | 0.421                                   | 0.122 | 1.141                                   | 0.449 | 0.224                                   | 0.053 | 0.120                                   | 0.041 |
|                           | 0.1                   | 0.0%          | 0.0%  | 0.301                                   | 0.153 | 0.892                                   | 0.558 | 0.193                                   | 0.050 | 0.120                                   | 0.042 |
|                           | 0.5                   | 96.1%         | 4.8%  | 0.240                                   | 0.230 | 0.737                                   | 0.699 | 0.227                                   | 0.035 | 0.789                                   | 0.288 |
|                           | 1                     | 100.0%        | 0.0%  | 0.343                                   | 0.201 | 0.965                                   | 0.567 | 0.299                                   | 0.096 | 1.230                                   | 0.489 |

**Table S4:** Dose-Dependent Mortality Rates of EPEC exposed to [C<sub>n</sub>mim][Cl] based ILs and corresponding molecular response values for four selected spectral regions.

| IL name                   | IL concentration [mM] | Mortality [%] |       | d-values for 2860-2845 cm <sup>-1</sup> |       | d-values for 2935-2915 cm <sup>-1</sup> |       | d-values for 1570-1515 cm <sup>-1</sup> |       | d-values for 1690-1620 cm <sup>-1</sup> |       |
|---------------------------|-----------------------|---------------|-------|-----------------------------------------|-------|-----------------------------------------|-------|-----------------------------------------|-------|-----------------------------------------|-------|
|                           |                       | Mean          | SD    | Mean                                    | SD    | Mean                                    | SD    | Mean                                    | SD    | Mean                                    | SD    |
| [C <sub>2</sub> mim][Cl]  | 0                     | 0.0%          | 0.0%  | 0.000                                   | 0.000 | 0.000                                   | 0.000 | 0.000                                   | 0.000 | 0.000                                   | 0.000 |
|                           | 750                   | 53.8%         | 28.8% | 0.025                                   | 0.017 | 0.065                                   | 0.009 | 0.172                                   | 0.017 | 0.085                                   | 0.003 |
|                           | 1000                  | 88.2%         | 5.6%  | 0.032                                   | 0.022 | 0.051                                   | 0.023 | 0.100                                   | 0.024 | 0.106                                   | 0.049 |
| [C <sub>4</sub> mim][Cl]  | 0                     | 0.0%          | 0.0%  | 0.000                                   | 0.000 | 0.000                                   | 0.000 | 0.000                                   | 0.000 | 0.000                                   | 0.000 |
|                           | 125                   | 25.8%         | 0.0%  | 0.034                                   | 0.031 | 0.043                                   | 0.026 | 0.191                                   | 0.156 | 0.089                                   | 0.048 |
|                           | 250                   | 0.0%          | 0.0%  | 0.015                                   | 0.031 | 0.031                                   | 0.017 | 0.141                                   | 0.116 | 0.067                                   | 0.037 |
|                           | 500                   | 18.0%         | 18.0% | 0.024                                   | 0.004 | 0.032                                   | 0.000 | 0.134                                   | 0.012 | 0.081                                   | 0.007 |
|                           | 750                   | 74.0%         | 20.2% | 0.022                                   | 0.008 | 0.082                                   | 0.044 | 0.204                                   | 0.109 | 1.974                                   | 3.244 |
|                           | 1000                  | 81.1%         | 18.4% | 0.021                                   | 0.018 | 0.083                                   | 0.046 | 0.197                                   | 0.133 | 2.142                                   | 3.513 |
| [C <sub>6</sub> mim][Cl]  | 0                     | 0.0%          | 0.0%  | 0.000                                   | 0.000 | 0.000                                   | 0.000 | 0.000                                   | 0.000 | 0.000                                   | 0.000 |
|                           | 50                    | 22.5%         | 31.8% | 0.007                                   | 0.004 | 0.082                                   | 0.019 | 0.200                                   | 0.060 | 0.266                                   | 0.092 |
|                           | 125                   | 67.7%         | 40.1% | 0.015                                   | 0.006 | 0.061                                   | 0.008 | 0.183                                   | 0.060 | 0.635                                   | 0.219 |
|                           | 250                   | 100.0%        | 0.0%  | 0.013                                   | 0.003 | 0.110                                   | 0.018 | 0.187                                   | 0.053 | 4.967                                   | 2.287 |
|                           | 500                   | 100.0%        | 0.0%  | 0.014                                   | 0.005 | 0.150                                   | 0.027 | 0.275                                   | 0.114 | 6.308                                   | 2.687 |
| [C <sub>8</sub> mim][Cl]  | 0                     | 0.0%          | 0.0%  | 0.000                                   | 0.000 | 0.000                                   | 0.000 | 0.000                                   | 0.000 | 0.000                                   | 0.000 |
|                           | 1                     | 0.0%          | 0.0%  | 0.061                                   | 0.050 | 0.184                                   | 0.122 | 0.188                                   | 0.045 | 0.102                                   | 0.015 |
|                           | 5                     | 56.5%         | 34.5% | 0.026                                   | 0.010 | 0.033                                   | 0.016 | 0.168                                   | 0.061 | 0.281                                   | 0.172 |
|                           | 12.5                  | 93.7%         | 6.5%  | 0.043                                   | 0.026 | 0.055                                   | 0.047 | 0.143                                   | 0.036 | 1.058                                   | 0.625 |
|                           | 25                    | 99.7%         | 0.5%  | 0.037                                   | 0.016 | 0.108                                   | 0.052 | 0.153                                   | 0.041 | 2.378                                   | 0.756 |
|                           | 50                    | 100.0%        | 0.0%  | 0.025                                   | 0.016 | 0.151                                   | 0.080 | 0.139                                   | 0.037 | 2.937                                   | 0.426 |
| [C <sub>10</sub> mim][Cl] | 0                     | 0.0%          | 0.0%  | 0.000                                   | 0.000 | 0.000                                   | 0.000 | 0.000                                   | 0.000 | 0.000                                   | 0.000 |
|                           | 0.1                   | 22.6%         | 17.6% | 0.027                                   | 0.028 | 0.074                                   | 0.055 | 0.060                                   | 0.037 | 0.039                                   | 0.017 |
|                           | 0.5                   | 99.8%         | 0.3%  | 0.069                                   | 0.030 | 0.065                                   | 0.009 | 0.131                                   | 0.043 | 0.541                                   | 0.048 |
|                           | 1                     | 99.8%         | 0.3%  | 0.041                                   | 0.025 | 0.201                                   | 0.182 | 0.112                                   | 0.040 | 0.780                                   | 0.077 |
|                           | 5                     | 99.9%         | 0.1%  | 0.023                                   | 0.009 | 0.111                                   | 0.032 | 0.121                                   | 0.039 | 2.513                                   | 0.241 |

**Table S5:** Dose-Dependent Mortality Rates of EPEC exposed to [C<sub>4</sub>mim][X] based ILs and corresponding molecular response values for four selected spectral regions.

| IL name                                | IL concentration [mM] | Mortality [%] |       | d-values [a.u.] for 2860-2845 cm <sup>-1</sup> |       | d-values for 2935-2915 cm <sup>-1</sup> |       | d-values for 1570-1515 cm <sup>-1</sup> |       | d-values for 1690-1620 cm <sup>-1</sup> |       |
|----------------------------------------|-----------------------|---------------|-------|------------------------------------------------|-------|-----------------------------------------|-------|-----------------------------------------|-------|-----------------------------------------|-------|
|                                        |                       | Mean          | SD    | Mean                                           | SD    | Mean                                    | SD    | Mean                                    | SD    | Mean                                    | SD    |
| [C <sub>4</sub> mim][BF <sub>4</sub> ] | 0                     | 0.0%          | 0.0%  | 0.000                                          | 0.000 | 0.000                                   | 0.000 | 0.000                                   | 0.000 | 0.000                                   | 0.000 |
|                                        | 10                    | 48.5%         | 35.3% | 0.086                                          | 0.055 | 0.115                                   | 0.070 | 0.171                                   | 0.077 | 0.344                                   | 0.189 |
|                                        | 50                    | 98.1%         | 1.9%  | 0.126                                          | 0.064 | 0.112                                   | 0.072 | 0.083                                   | 0.030 | 1.427                                   | 0.377 |
|                                        | 125                   | 99.9%         | 0.1%  | 0.105                                          | 0.046 | 0.083                                   | 0.031 | 0.117                                   | 0.051 | 2.322                                   | 0.533 |
|                                        | 250                   | 100.0%        | 0.0%  | 0.057                                          | 0.036 | 0.051                                   | 0.019 | 0.132                                   | 0.035 | 3.021                                   | 0.588 |
|                                        | 500                   | 100.0%        | 0.0%  | 0.021                                          | 0.020 | 0.030                                   | 0.025 | 0.125                                   | 0.102 | 2.862                                   | 2.412 |
| [C <sub>4</sub> mim][HFB]              | 0                     | 0.0%          | 0.0%  | 0.000                                          | 0.000 | 0.000                                   | 0.000 | 0.000                                   | 0.000 | 0.000                                   | 0.000 |
|                                        | 50                    | 24.9%         | 40.7% | 0.040                                          | 0.016 | 0.109                                   | 0.033 | 0.239                                   | 0.031 | 0.148                                   | 0.054 |
|                                        | 125                   | 86.9%         | 9.3%  | 0.084                                          | 0.034 | 0.089                                   | 0.047 | 0.235                                   | 0.036 | 0.273                                   | 0.053 |
|                                        | 250                   | 100.0%        | 0.0%  | 0.061                                          | 0.035 | 0.054                                   | 0.015 | 0.096                                   | 0.023 | 2.925                                   | 0.286 |
|                                        | 500                   | 100.0%        | 0.0%  | 0.013                                          | 0.008 | 1.045                                   | 0.400 | 0.326                                   | 0.024 | 9.595                                   | 0.387 |
|                                        | 750                   | 100.0%        | 0.0%  | 0.056                                          | 0.048 | 5.345                                   | 4.468 | 0.648                                   | 0.538 | 11.377                                  | 9.610 |
| [C <sub>4</sub> mim][PF <sub>6</sub> ] | 0                     | 0.0%          | 0.0%  | 0.000                                          | 0.000 | 0.000                                   | 0.000 | 0.000                                   | 0.000 | 0.000                                   | 0.000 |
|                                        | 50                    | 0.0%          | 0.0%  | 0.128                                          | 0.114 | 0.103                                   | 0.081 | 0.369                                   | 0.306 | 0.133                                   | 0.105 |
|                                        | 125                   | 84.8%         | 1.7%  | 0.086                                          | 0.026 | 0.053                                   | 0.019 | 0.316                                   | 0.055 | 0.249                                   | 0.019 |
|                                        | 250                   | 98.7%         | 1.8%  | 0.101                                          | 0.067 | 0.133                                   | 0.089 | 0.352                                   | 0.060 | 0.666                                   | 0.336 |
|                                        | 500                   | 100.0%        | 0.0%  | 0.072                                          | 0.029 | 0.135                                   | 0.086 | 0.247                                   | 0.073 | 1.149                                   | 0.712 |
|                                        | 750                   | 100.0%        | 0.0%  | 0.085                                          | 0.042 | 0.069                                   | 0.024 | 0.105                                   | 0.018 | 2.397                                   | 0.366 |
| [C <sub>4</sub> mim][TFA]              | 0                     | 0.0%          | 0.0%  | 0.000                                          | 0.000 | 0.000                                   | 0.000 | 0.000                                   | 0.000 | 0.000                                   | 0.000 |
|                                        | 125                   | 28.6%         | 28.6% | 0.060                                          | 0.024 | 0.146                                   | 0.057 | 0.155                                   | 0.027 | 0.225                                   | 0.033 |
|                                        | 250                   | 99.2%         | 0.9%  | 0.091                                          | 0.058 | 0.150                                   | 0.093 | 0.098                                   | 0.031 | 1.292                                   | 0.232 |
|                                        | 500                   | 100.0%        | 0.0%  | 0.075                                          | 0.067 | 0.125                                   | 0.111 | 0.135                                   | 0.023 | 2.318                                   | 0.387 |
|                                        | 750                   | 97.8%         | 3.8%  | 0.064                                          | 0.055 | 0.111                                   | 0.105 | 0.118                                   | 0.064 | 2.183                                   | 1.177 |
|                                        | 1000                  | 100.0%        | 0.0%  | 0.033                                          | 0.027 | 0.065                                   | 0.028 | 0.163                                   | 0.003 | 3.144                                   | 0.350 |
| [C <sub>2</sub> mim][Triflat]          | 0                     | 0.0%          | 0.0%  | 0.000                                          | 0.000 | 0.000                                   | 0.000 | 0.000                                   | 0.000 | 0.000                                   | 0.000 |
|                                        | 50                    | 0.0%          | 0.0%  | 0.063                                          | 0.052 | 0.242                                   | 0.198 | 0.244                                   | 0.204 | 0.084                                   | 0.065 |
|                                        | 125                   | 0.0%          | 0.0%  | 0.104                                          | 0.087 | 0.299                                   | 0.240 | 0.278                                   | 0.234 | 0.119                                   | 0.094 |
|                                        | 500                   | 57.6%         | 42.2% | 0.059                                          | 0.041 | 0.097                                   | 0.078 | 0.237                                   | 0.097 | 2.057                                   | 2.218 |
|                                        | 750                   | 100.0%        | 0.0%  | 0.046                                          | 0.001 | 0.187                                   | 0.152 | 0.853                                   | 0.171 | 9.025                                   | 0.037 |
|                                        | 1000                  | 100.0%        | 0.0%  | 0.050                                          | 0.033 | 0.403                                   | 0.308 | 1.131                                   | 0.443 | 9.944                                   | 1.088 |

**Table S6:** Dose-Dependent Mortality Rates of EPEC exposed to Ammonium based ILs and corresponding molecular response values for four selected spectral regions.

| IL name                       | IL concentration<br>[mM] | Mortality [%] |       | d-values for<br>2860-2845 cm <sup>-1</sup> |       | d-values for<br>2935-2915 cm <sup>-1</sup> |       | d-values for<br>1570-1515 cm <sup>-1</sup> |       | d-values for<br>1690-1620 cm <sup>-1</sup> |       |
|-------------------------------|--------------------------|---------------|-------|--------------------------------------------|-------|--------------------------------------------|-------|--------------------------------------------|-------|--------------------------------------------|-------|
|                               |                          | Mean          | SD    | Mean                                       | SD    | Mean                                       | SD    | Mean                                       | SD    | Mean                                       | SD    |
| [TMA][Cl]                     | 0                        | 0.0%          | 0.0%  | 0.000                                      | 0.000 | 0.000                                      | 0.000 | 0.000                                      | 0.000 | 0.000                                      | 0.000 |
|                               | 250                      | 43.0%         | 39.1% | 0.082                                      | 0.053 | 0.200                                      | 0.137 | 0.201                                      | 0.082 | 0.151                                      | 0.096 |
|                               | 500                      | 91.3%         | 35.6% | 0.120                                      | 0.099 | 0.291                                      | 0.275 | 0.223                                      | 0.084 | 2.116                                      | 2.471 |
|                               | 750                      | 99.7%         | 0.4%  | 0.181                                      | 0.152 | 0.482                                      | 0.486 | 0.218                                      | 0.049 | 3.425                                      | 2.660 |
|                               | 1000                     | 100.0%        | 0.0%  | 0.586                                      | 0.797 | 1.832                                      | 2.640 | 0.185                                      | 0.029 | 3.323                                      | 2.435 |
| [TMC <sub>4</sub> A]<br>[Cl]  | 0                        | 0.0%          | 0.0%  | 0.000                                      | 0.000 | 0.000                                      | 0.000 | 0.000                                      | 0.000 | 0.000                                      | 0.000 |
|                               | 50                       | 72.7%         | 0.0%  | 0.084                                      | 0.074 | 0.127                                      | 0.107 | 0.098                                      | 0.080 | 0.072                                      | 0.056 |
|                               | 125                      | 72.7%         | 0.0%  | 0.065                                      | 0.057 | 0.089                                      | 0.072 | 0.109                                      | 0.089 | 0.119                                      | 0.096 |
|                               | 250                      | 74.1%         | 34.7% | 0.084                                      | 0.051 | 0.162                                      | 0.105 | 0.179                                      | 0.014 | 1.850                                      | 2.271 |
|                               | 500                      | 66.7%         | 47.1% | 0.072                                      | 0.026 | 0.125                                      | 0.092 | 0.179                                      | 0.023 | 2.505                                      | 2.899 |
|                               | 750                      | 100.0%        | 0.0%  | 0.021                                      | 0.016 | 0.057                                      | 0.025 | 0.158                                      | 0.021 | 3.866                                      | 2.731 |
|                               | 1000                     | 96.8%         | 0.0%  | 0.276                                      | 0.237 | 0.817                                      | 0.670 | 0.159                                      | 0.131 | 0.531                                      | 0.446 |
| [TMC <sub>9</sub> A]<br>[Cl]  | 0                        | 0.0%          | 0.0%  | 0.000                                      | 0.000 | 0.000                                      | 0.000 | 0.000                                      | 0.000 | 0.000                                      | 0.000 |
|                               | 12.5                     | 0.0%          | 81.9% | 0.018                                      | 0.002 | 0.044                                      | 0.017 | 0.193                                      | 0.042 | 0.272                                      | 0.029 |
|                               | 25                       | 93.6%         | 9.1%  | 0.009                                      | 0.003 | 0.029                                      | 0.001 | 0.153                                      | 0.034 | 0.502                                      | 0.167 |
|                               | 50                       | 100.0%        | 0.0%  | 0.032                                      | 0.031 | 0.092                                      | 0.024 | 0.184                                      | 0.020 | 1.551                                      | 0.218 |
| [TMC <sub>10</sub> A]<br>[Cl] | 0                        | 0.0%          | 0.0%  | 0.000                                      | 0.000 | 0.000                                      | 0.000 | 0.000                                      | 0.000 | 0.000                                      | 0.000 |
|                               | 0.1                      | 56.4%         | 22.2% | 0.021                                      | 0.006 | 0.081                                      | 0.017 | 0.118                                      | 0.017 | 0.062                                      | 0.014 |
|                               | 0.5                      | 98.9%         | 1.2%  | 0.025                                      | 0.011 | 0.056                                      | 0.012 | 0.085                                      | 0.054 | 0.384                                      | 0.131 |
|                               | 1                        | 98.6%         | 1.4%  | 0.009                                      | 0.003 | 0.053                                      | 0.013 | 0.079                                      | 0.046 | 0.776                                      | 0.186 |
|                               | 5                        | 100.0%        | 0.0%  | 0.228                                      | 0.150 | 0.294                                      | 0.101 | 0.077                                      | 0.014 | 1.648                                      | 0.336 |
|                               | 10                       | 100.0%        | 0.0%  | 0.306                                      | 0.053 | 0.498                                      | 0.101 | 0.140                                      | 0.001 | 1.899                                      | 0.661 |
|                               | 12.5                     | 100.0%        | 0.0%  | 0.343                                      | 0.291 | 0.486                                      | 0.407 | 0.066                                      | 0.049 | 2.230                                      | 1.878 |
|                               | 25                       | 100.0%        | 0.0%  | 0.289                                      | 0.244 | 0.559                                      | 0.462 | 0.361                                      | 0.265 | 3.866                                      | 3.198 |
| [TMC <sub>12</sub> A]<br>[Cl] | 0                        | 0.0%          | 0.0%  | 0.000                                      | 0.000 | 0.000                                      | 0.000 | 0.000                                      | 0.000 | 0.000                                      | 0.000 |
|                               | 0.1                      | -50.0%        | 50.0% | 0.021                                      | 0.009 | 0.069                                      | 0.018 | 0.073                                      | 0.063 | 0.030                                      | 0.019 |
|                               | 0.5                      | 48.9%         | 23.9% | 0.020                                      | 0.008 | 0.051                                      | 0.028 | 0.153                                      | 0.004 | 0.140                                      | 0.019 |
|                               | 1                        | 78.2%         | 16.1% | 0.033                                      | 0.018 | 0.032                                      | 0.009 | 0.142                                      | 0.023 | 0.242                                      | 0.104 |
|                               | 5                        | 99.9%         | 0.2%  | 0.010                                      | 0.006 | 0.058                                      | 0.022 | 0.074                                      | 0.019 | 1.248                                      | 0.132 |
|                               | 10                       | 100.0%        | 0.1%  | 0.068                                      | 0.075 | 0.269                                      | 0.182 | 0.080                                      | 0.015 | 2.616                                      | 0.817 |
| [TMC <sub>16</sub> A]<br>[Cl] | 0                        | 0.0%          | 0.0%  | 0.000                                      | 0.000 | 0.000                                      | 0.000 | 0.000                                      | 0.000 | 0.000                                      | 0.000 |
|                               | 0.05                     | 8.3%          | 31.2% | 0.097                                      | 0.039 | 0.415                                      | 0.079 | 0.117                                      | 0.034 | 0.054                                      | 0.017 |
|                               | 0.1                      | 18.1%         | 5.2%  | 0.120                                      | 0.059 | 0.536                                      | 0.313 | 0.109                                      | 0.039 | 0.075                                      | 0.034 |
|                               | 0.5                      | 70.0%         | 60.0% | 0.076                                      | 0.062 | 0.612                                      | 0.169 | 0.087                                      | 0.045 | 0.490                                      | 0.239 |
|                               | 1                        | 99.9%         | 0.1%  | 0.072                                      | 0.078 | 0.438                                      | 0.079 | 0.071                                      | 0.025 | 0.734                                      | 0.208 |
|                               | 5                        | 100.0%        | 0.0%  | 0.062                                      | 0.044 | 1.054                                      | 0.275 | 0.217                                      | 0.167 | 0.969                                      | 0.223 |
|                               | 10                       | 100.0%        | 0.0%  | 0.406                                      | 0.347 | 2.702                                      | 1.382 | 0.550                                      | 0.153 | 0.792                                      | 0.067 |
| [TC <sub>8</sub> MA]<br>[Cl]  | 20                       | 100.0%        | 0.0%  | 1.369                                      | 1.163 | 5.958                                      | 5.042 | 0.810                                      | 0.675 | 0.675                                      | 0.562 |
|                               | 0                        | 0.0%          | 0.0%  | 0.000                                      | 0.000 | 0.000                                      | 0.000 | 0.000                                      | 0.000 | 0.000                                      | 0.000 |
|                               | 0.01                     | 0.0%          | 0.0%  | 0.087                                      | 0.077 | 0.243                                      | 0.196 | 0.179                                      | 0.149 | 0.085                                      | 0.068 |
|                               | 0.05                     | 66.1%         | 46.8% | 0.050                                      | 0.048 | 0.439                                      | 0.431 | 0.131                                      | 0.033 | 0.254                                      | 0.102 |
|                               | 0.1                      | 100.0%        | 0.0%  | 0.750                                      | 0.574 | 1.167                                      | 0.367 | 0.107                                      | 0.006 | 1.757                                      | 1.492 |
|                               | 0.25                     | 100.0%        | 0.0%  | 0.789                                      | 0.000 | 1.507                                      | 0.000 | 0.032                                      | 0.000 | 0.663                                      | 0.000 |
|                               | 0.5                      | 100.0%        | 0.0%  | 1.763                                      | 1.150 | 1.936                                      | 0.888 | 0.122                                      | 0.063 | 3.625                                      | 2.776 |
|                               | 1                        | 100.0%        | 0.0%  | 4.479                                      | 0.327 | 3.556                                      | 0.314 | 0.258                                      | 0.023 | 6.761                                      | 0.796 |
| [DC <sub>8</sub> DMA]<br>[Cl] | 2.5                      | 100.0%        | 0.0%  | 3.668                                      | 3.102 | 3.216                                      | 2.713 | 0.074                                      | 0.058 | 6.248                                      | 5.277 |
|                               | 0                        | 0.0%          | 0.0%  | 0.000                                      | 0.000 | 0.000                                      | 0.000 | 0.000                                      | 0.000 | 0.000                                      | 0.000 |
|                               | 0.05                     | 16.7%         | 23.6% | 0.019                                      | 0.013 | 0.053                                      | 0.034 | 0.099                                      | 0.035 | 0.041                                      | 0.008 |
|                               | 0.1                      | 0.0%          | 0.0%  | 0.025                                      | 0.011 | 0.091                                      | 0.057 | 0.079                                      | 0.047 | 0.056                                      | 0.027 |
|                               | 0.5                      | 75.0%         | 35.4% | 0.022                                      | 0.004 | 0.177                                      | 0.068 | 0.100                                      | 0.069 | 0.395                                      | 0.267 |
|                               | 1                        | 99.8%         | 0.2%  | 0.048                                      | 0.046 | 0.263                                      | 0.151 | 0.103                                      | 0.057 | 0.596                                      | 0.353 |
|                               | 1.25                     | 100.0%        | 0.0%  | 0.046                                      | 0.041 | 0.393                                      | 0.321 | 0.044                                      | 0.032 | 0.646                                      | 0.543 |
|                               | 2.5                      | 100.0%        | 0.0%  | 0.137                                      | 0.118 | 0.459                                      | 0.388 | 0.058                                      | 0.044 | 1.375                                      | 1.158 |
|                               | 5                        | 100.0%        | 0.0%  | 0.237                                      | 0.206 | 0.570                                      | 0.482 | 0.113                                      | 0.087 | 2.639                                      | 2.227 |

**Table S7:** Peak shifts the asymmetric  $\nu_{as}(\text{CH}_2)$  (near  $2923\text{ cm}^{-1}$ ) and symmetric  $\nu_s(\text{CH}_2)$  (near  $2852\text{ cm}^{-1}$ ) stretching mode of  $\text{CH}_2$  functional groups in fatty acids of MRSA at different IL concentrations.

|                                           | Concentration<br>[mM] | $\nu_{as}(\text{CH}_2)$<br>Peak | $\nu_s(\text{CH}_2)$<br>Peak |
|-------------------------------------------|-----------------------|---------------------------------|------------------------------|
| <b>PBS</b>                                |                       | 2922                            | 2852                         |
| <b>[TMC<sub>16</sub>A][Cl]</b>            | 0.05                  | 2920                            | 2851                         |
|                                           | 0.1                   | 2920                            | 2851                         |
|                                           | 0.5                   | 2922                            | 2852                         |
|                                           | 1                     | 2922                            | 2852                         |
|                                           | 5                     | 2922                            | 2852                         |
| <b>[TC<sub>8</sub>MA][Cl]</b>             | 0.01                  | 2920                            | 2851                         |
|                                           | 0.05                  | 2923                            | 2853                         |
|                                           | 0.1                   | 2925                            | 2852                         |
|                                           | 0.25                  | 2925                            | 2853                         |
| <b>[TMC<sub>10</sub>A][Cl]</b>            | 0.1                   | 2921                            | 2852                         |
|                                           | 0.5                   | 2922                            | 2852                         |
|                                           | 1                     | 2923                            | 2852                         |
|                                           | 5                     | 2924                            | 2853                         |
| <b>[C<sub>4</sub>Mim][PF<sub>6</sub>]</b> | 50                    | 2920                            | 2852                         |
|                                           | 125                   | 2922                            | 2852                         |
|                                           | 250                   | 2922                            | 2852                         |
|                                           | 500                   | 2922                            | 2852                         |
|                                           | 1000                  | 2923                            | 2852                         |
